# Supplementary material for: The Influence of Sociodemographic Heterogeneity on the Perceptions of COVID-19: A Countrywide Survey Study in the USA
Source: MDPI journal article supplement (doi:10.3390/ijerph18178922), 2021-08-25
Supplement: s1 [file s1]

## **Preventive behavior**

- 1) Do you follow the recommendations to maintain 'social distancing'?
  - i) Strongly agree
  - ii) Agree
  - iii) Neutral
  - iv) Disagree
  - v) Strongly disagree
- 2) Do you follow the recommendations to maintain 'Lock down'?
  - i) Strongly agree
  - ii) Agree
  - iii) Neutral
  - iv) Disagree
  - v) Strongly disagree
- 3) Do you follow the recommendations for 'Hand washing for 20 seconds' whenever applicable?
  - i) Strongly agree
  - ii) Agree
  - iii) Neutral
  - iv) Disagree
  - v) Strongly disagree
- 4) Do you use 'Face mask' in public?
  - i) Strongly agree
  - ii) Agree
  - iii) Neutral
  - iv) Disagree
  - v) Strongly disagree
- 5) One should go to Emergency/doctor immediately if he/she has symptoms like COVID-19?
  - i) Strongly agree
  - ii) Agree
  - iii) Neutral
  - iv) Disagree
  - v) Strongly disagree

## Knowledge

### Who are at high risk for serious coronavirus infection?

1. Elderly people (age >60 years)

- i) Yes
- ii) No

2. Children (0-5 years)

- i) Yes
- ii) No

3. Smokers

- i) Yes
- ii) No

4. Diabetic patients

- i) Yes
- ii) No

5. People without ability to fight infection

- i) Yes
- ii) No

6) Pregnant women

- i) Yes
- ii) No

7) Most COVID-19 patients need hospitalization

- i) Yes
- ii) No

8) One in five COVID-19 patients die

- i) Yes
- ii) No

9) It takes 2-3 weeks to have disease symptoms after getting coronavirus

- i) Yes
- ii) No

10) Before COVID-19, we did not know that coronavirus can affect human

- i) Yes
- ii) No

11) We can get COVID-19 from animals

- i) Yes
- ii) No

12) Every person in the community should be tested for COVID-19 radio (Matrix)

- i) Yes
- ii) No

**Which of the following helps to prevent COVID-19?**

13) Hand washing

- i) Yes
- ii) No

14) Hot and humid climate

- i) Yes
- ii) No

15) Exposure to bright sunlight

- i) Yes
- ii) No

16) Saline nasal spray

- i) Yes
- ii) No

17) Drinking hot beverages or alcohol

- i) Yes
- ii) No

18) Hand sanitizer containing alcohol radio

- i) Yes
- ii) No

19) Baby wipes

- i) Yes
- ii) No

20) COVID-19 symptoms include (CHECK ALL THAT APPLY) :

- i) Fever
- ii) Cough
- iii) Shortness of breath
- iv) Body ache
- v) Sore throat

21) Vaccine

- i) Pneumonia vaccine offers some protection against COVID-19
- ii) Flu shot offers some protection against COVID-19
- iii) Both 1 and 2 are true
- iv) Both 1 and 2 are false

22) Protective measures (CHECK ALL THAT APPLY)

- i) Face-mask prevents the spread of COVID-19
- ii) Rubber gloves should be used while going outside (such as groceries)

23) Social distancing means keeping \_\_\_\_ feet gap between two persons:

- i) 3 feet
- ii) 6 feet
- iii) 10 feet
- iv) 15 feet

24) If you had contact with a COVID-19 patient, you should be isolated for:

- i) One week
- ii) Two weeks
- iii) Three weeks
- iv) Four weeks

25) Coronavirus can live on a surface for:

- i) Up to 6 hours
- ii) Few hours to 3 days
- iii) Up to 14 days

26) COVID-19 usually spreads via (CHECK ALL THAT APPLY):

- i) Contact (by touch)
- ii) Droplet (such as sneeze)
- iii) Water (drinking water, shower)
- iv) Wind/air

27) Hydroxychloroquine (Plaquenil) is useful to treat COVID-19

- i) Strongly agree
- ii) Agree
- iii) Neutral
- iv) Disagree
- v) Strongly disagree

# Stress

## Stress Related to COVID-19 Pandemic

- 1) Being confined at home with minimal social interaction is
  - i) Very stressful
  - ii) Stressful
  - iii) Sometimes stressful
  - iv) Mostly handled well
  - v) Not stressful at all
- 2) Job situation or possibility of financial instability is
  - vi) Very stressful
  - vii) Stressful
  - viii) Sometimes stressful
  - ix) Mostly handled well
  - x) Not stressful at all
- 3) The possibility of getting infected with COVID-19 is
  - i) Very stressful
  - ii) Stressful
  - iii) Sometimes stressful
  - iv) Mostly handled well
  - v) Not stressful at all
- 4) Possible shortage of food and other essentials in the coming months
  - i) Very stressful
  - ii) Stressful
  - iii) Sometimes stressful
  - iv) Mostly handled well
  - v) Not stressful at all
- 5) One of your family members is at risk of serious complication due to COVID-19
  - i) Very stressful
  - ii) Stressful
  - iii) Sometimes stressful
  - iv) Mostly handled well
  - v) Not stressful at all

6) Lack of access to a good medical facility

- i) Very stressful
- ii) Stressful
- iii) Sometimes stressful
- iv) Mostly handled well
- v) Not stressful at all

7) Situation of COVID-19 at your state

- i) Very stressful
- ii) Stressful
- iii) Sometimes stressful
- iv) Mostly handled well
- v) Not stressful at all
