# Supplementary material for: The Influence of Sociodemographic Heterogeneity on the Perceptions of COVID-19: A Countrywide Survey Study in the USA
Source: Int J Environ Res Public Health. 2021 Aug 25;18(17):8922. doi: 10.3390/ijerph18178922 (PMC8431068; doi:10.3390/ijerph18178922)
Supplement: Supplementary file 1 [file ijerph-18-08922-s001.zip]

Archive with 4 entries (4 files):
- Supplemental table S1.xlsx
- Supplemental table S2.xlsx
- Supplemental table S3.xlsx
- Supplemental File 1_Survey questions.pdf
