# Supplementary material for: The Influence of Sociodemographic Heterogeneity on the Perceptions of COVID-19: A Countrywide Survey Study in the USA
Source: Int J Environ Res Public Health. 2021 Aug 25;18(17):8922. doi: 10.3390/ijerph18178922 (PMC8431068; doi:10.3390/ijerph18178922)
Supplement: Supplementary file 1 [file ijerph-18-08922-s001.zip › Supplemental table S1.xlsx]

## Sheet: Sheet1
Comparative analyses of preventive behavior, knowledge and stress among different races and age-groups with ANOVA (posthoc Bonferroni)
Race								Age
Dependent Variable	Group 1	Group 2	Mean Difference (group 1 vs. 2)	Sig.	95% Confidence Interval			Dependent Variable	Group 1	Group 2	Mean Difference (group 1 vs. 2)	Sig.	95% Confidence Interval
					Lower Bound	Upper Bound							Lower Bound	Upper Bound
Knowledge	White	African-American	.79508*	4.6074e-17	0.538892	1.05126		Knowledge	18-24 years	25-44 years	-0.175976	0.771767	-0.455589	0.103637
		Hispanic	.65419*	2.24006e-12	0.404751	0.90362				45-60 years	-0.0581439	1	-0.344048	0.22776
		Asian	.50126*	1.87807e-05	0.206409	0.796119				61-70 years	-0.0603131	1	-0.349066	0.22844
		Others	.42468*	0.000677556	0.125662	0.723691				>70 years	0.0452723	1	-0.260041	0.350585
	African-American	White	-.79508*	4.6074e-17	-1.05126	-0.538892			25-44 years	18-24 years	0.175976	0.771767	-0.103637	0.455589
		Hispanic	-0.140891	1	-0.484728	0.202945				45-60 years	0.117832	0.441314	-0.0465435	0.282207
		Asian	-0.293813	0.291124	-0.671894	0.0842683				61-70 years	0.115663	0.550386	-0.0536197	0.284945
		Others	-0.3704	0.0639801	-0.751734	0.0109333				>70 years	.22125*	0.0155163	0.0250484	0.417448
	Hispanic	White	-.65419*	2.24006e-12	-0.90362	-0.404751			45-60 years	18-24 years	0.0581439	1	-0.22776	0.344048
		African-American	0.140891	1	-0.202945	0.484728				25-44 years	-0.117832	0.441314	-0.282207	0.0465435
		Asian	-0.152922	1	-0.526462	0.220618				61-70 years	-0.00216921	1	-0.181652	0.177314
		Others	-0.229509	0.872044	-0.606341	0.147323				>70 years	0.103416	1	-0.101649	0.308482
	Asian	White	-.50126*	1.87807e-05	-0.796119	-0.206409			61-70 years	18-24 years	0.0603131	1	-0.22844	0.349066
		African-American	0.293813	0.291124	-0.0842683	0.671894				25-44 years	-0.115663	0.550386	-0.284945	0.0536197
		Hispanic	0.152922	1	-0.220618	0.526462				45-60 years	0.00216921	1	-0.177314	0.181652
		Others	-0.0765874	1	-0.484906	0.331731				>70 years	0.105585	1	-0.103434	0.314605
	Others	White	-.42468*	0.000677556	-0.723691	-0.125662			>70 years	18-24 years	-0.0452723	1	-0.350585	0.260041
		African-American	0.3704	0.0639801	-0.0109333	0.751734				25-44 years	-.22125*	0.0155163	-0.417448	-0.0250484
		Hispanic	0.229509	0.872044	-0.147323	0.606341				45-60 years	-0.103416	1	-0.308482	0.101649
		Asian	0.0765874	1	-0.331731	0.484906				61-70 years	-0.105585	1	-0.314605	0.103434
Stress	White	African-American	-0.383155	0.0805764	-0.789097	0.0227856		Stress	18-24 years	25-44 years	0.165513	1	-0.289508	0.620534
		Hispanic	-.91246*	5.08901e-09	-1.32354	-0.501384				45-60 years	0.440756	0.0746587	-0.0217247	0.903236
		Asian	-0.0414909	1	-0.525458	0.442476				61-70 years	.90590*	4.7206e-07	0.441047	1.37076
		Others	-0.421186	0.175849	-0.919231	0.0768595				>70 years	1.59924*	8.73525e-19	1.10883	2.08965
	African-American	White	0.383155	0.0805764	-0.0227856	0.789097			25-44 years	18-24 years	-0.165513	1	-0.620534	0.289508
		Hispanic	-0.529305	0.0739512	-1.08404	0.0254279				45-60 years	.27524*	0.0309118	0.0141102	0.536376
		Asian	0.341665	1	-0.269047	0.952376				61-70 years	.74039*	6.04955e-14	0.475072	1.00571
		Others	-0.0380301	1	-0.659957	0.583897				>70 years	1.43373*	3.51801e-37	1.12582	1.74164
	Hispanic	White	.91246*	5.08901e-09	0.501384	1.32354			45-60 years	18-24 years	-0.440756	0.0746587	-0.903236	0.0217247
		African-American	0.529305	0.0739512	-0.0254279	1.08404				25-44 years	-.27524*	0.0309118	-0.536376	-0.0141102
		Asian	.87097*	0.000693334	0.256833	1.48511				61-70 years	.46515*	2.68889e-05	0.187231	0.743067
		Others	0.491275	0.273902	-0.134016	1.11657				>70 years	1.15848*	4.10643e-23	0.839655	1.47731
	Asian	White	0.0414909	1	-0.442476	0.525458			61-70 years	18-24 years	-.90590*	4.7206e-07	-1.37076	-0.441047
		African-American	-0.341665	1	-0.952376	0.269047				25-44 years	-.74039*	6.04955e-14	-1.00571	-0.475072
		Hispanic	-.87097*	0.000693334	-1.48511	-0.256833				45-60 years	-.46515*	2.68889e-05	-0.743067	-0.187231
		Others	-0.379695	1	-1.05514	0.295753				>70 years	.69333*	1.67455e-08	0.371067	1.0156
	Others	White	0.421186	0.175849	-0.0768595	0.919231			>70 years	18-24 years	-1.59924*	8.73525e-19	-2.08965	-1.10883
		African-American	0.0380301	1	-0.583897	0.659957				25-44 years	-1.43373*	3.51801e-37	-1.74164	-1.12582
		Hispanic	-0.491275	0.273902	-1.11657	0.134016				45-60 years	-1.15848*	4.10643e-23	-1.47731	-0.839655
		Asian	0.379695	1	-0.295753	1.05514				61-70 years	-.69333*	1.67455e-08	-1.0156	-0.371067
Preventive behavior	White	African-American	-.49309*	0.000577177	-0.837021	-0.149159		Preventive behavior	18-24 years	25-44 years	0.204242	1	-0.199864	0.608347
		Hispanic	-0.343279	0.0606668	-0.694434	0.00787475				45-60 years	0.303253	0.379919	-0.1071	0.713605
		Asian	-0.131145	1	-0.540871	0.278581				61-70 years	0.225748	1	-0.187113	0.638608
		Others	0.0135359	1	-0.405181	0.432253				>70 years	0.283686	0.662729	-0.150042	0.717414
	African-American	White	.49309*	0.000577177	0.149159	0.837021			25-44 years	18-24 years	-0.204242	1	-0.608347	0.199864
		Hispanic	0.14981	1	-0.322339	0.62196				45-60 years	0.0990107	1	-0.132753	0.330774
		Asian	0.361945	0.494137	-0.155251	0.87914				61-70 years	0.0215061	1	-0.21467	0.257682
		Others	0.506626	0.0668237	-0.0177208	1.03097				>70 years	0.079444	1	-0.191563	0.350451
	Hispanic	White	0.343279	0.0606668	-0.00787475	0.694434			45-60 years	18-24 years	-0.303253	0.379919	-0.713605	0.1071
		African-American	-0.14981	1	-0.62196	0.322339				25-44 years	-0.0990107	1	-0.330774	0.132753
		Asian	0.212134	1	-0.309893	0.734161				61-70 years	-0.0775046	1	-0.324217	0.169208
		Others	0.356815	0.582826	-0.172297	0.885928				>70 years	-0.0195667	1	-0.299804	0.260671
	Asian	White	0.131145	1	-0.278581	0.540871			61-70 years	18-24 years	-0.225748	1	-0.638608	0.187113
		African-American	-0.361945	0.494137	-0.87914	0.155251				25-44 years	-0.0215061	1	-0.257682	0.21467
		Hispanic	-0.212134	1	-0.734161	0.309893				45-60 years	0.0775046	1	-0.169208	0.324217
		Others	0.144681	1	-0.424991	0.714353				>70 years	0.057938	1	-0.225959	0.341835
	Others	White	-0.0135359	1	-0.432253	0.405181			>70 years	18-24 years	-0.283686	0.662729	-0.717414	0.150042
		African-American	-0.506626	0.0668237	-1.03097	0.0177208				25-44 years	-0.079444	1	-0.350451	0.191563
		Hispanic	-0.356815	0.582826	-0.885928	0.172297				45-60 years	0.0195667	1	-0.260671	0.299804
		Asian	-0.144681	1	-0.714353	0.424991				61-70 years	-0.057938	1	-0.341835	0.225959
*. The mean difference is significant at the 0.05 level.								*. The mean difference is significant at the 0.05 level.
