# Supplementary material for: The Influence of Sociodemographic Heterogeneity on the Perceptions of COVID-19: A Countrywide Survey Study in the USA
Source: Int J Environ Res Public Health. 2021 Aug 25;18(17):8922. doi: 10.3390/ijerph18178922 (PMC8431068; doi:10.3390/ijerph18178922)
Supplement: Supplementary file 1 [file ijerph-18-08922-s001.zip › Supplemental table S2.xlsx]

## Sheet: Sheet1
Comparative analyses of preventive behavior, knowledge and stress with ANOVA (posthoc Bonferroni), among various groups categorized by education level and family income
Education level								Family income
Dependent Variable	Group 1	Group 2	Mean Difference (group 1 vs. 2)	Sig.	95% Confidence Interval				Group 1	Group 2	Mean Difference (group 1 vs. 2)	Sig.	95% Confidence Interval
					Lower Bound	Upper Bound							Lower Bound	Upper Bound
Knowledge	≤ High School	Undergraduate	-.45944*	1.78323e-08	-0.673299	-0.245581		Knowledge	Lower middle class	Middle class	-.59908*	1.10951e-19	-0.768468	-0.429691
		Graduate/Bachelors	-.43173*	5.00902e-07	-0.65366	-0.209807				Upper middle class	-.75933*	6.96887e-25	-0.949035	-0.569633
		Masters	-.67073*	6.6133e-17	-0.88792	-0.453538				Rich/affluent	-.84275*	1.37363e-06	-1.27177	-0.413735
		PhD./MD/MBA/Professionals	-.74364*	3.14109e-17	-0.982062	-0.505214			Middle class	Lower middle class	.59908*	1.10951e-19	0.429691	0.768468
	Undergraduate	≤ High School	.45944*	1.78323e-08	0.245581	0.673299				Upper middle class	-.16025*	0.0109461	-0.295846	-0.0246628
		Graduate/Bachelors	0.0277064	1	-0.148634	0.204047				Rich/affluent	-0.243672	0.689763	-0.65166	0.164316
		Masters	-.21129*	0.00500353	-0.381631	-0.0409464			Upper middle class	Lower middle class	.75933*	6.96887e-25	0.569633	0.949035
		PhD./MD/MBA/Professionals	-.28420*	0.000506012	-0.480898	-0.0874977				Middle class	.16025*	0.0109461	0.0246628	0.295846
	Graduate/Bachelors	≤ High School	.43173*	5.00902e-07	0.209807	0.65366				Rich/affluent	-0.0834178	1	-0.500249	0.333413
		Undergraduate	-0.0277064	1	-0.204047	0.148634			Rich/affluent	Lower middle class	.84275*	1.37363e-06	0.413735	1.27177
		Masters	-.23900*	0.00201084	-0.419362	-0.0586286				Middle class	0.243672	0.689763	-0.164316	0.65166
		PhD./MD/MBA/Professionals	-.31190*	0.000206196	-0.517347	-0.106462				Upper middle class	0.0834178	1	-0.333413	0.500249
	Masters	≤ High School	.67073*	6.6133e-17	0.453538	0.88792		Stress	Lower middle class	Middle class	1.03581*	8.43913e-23	0.764607	1.30701
		Undergraduate	.21129*	0.00500353	0.0409464	0.381631				Upper middle class	1.60865*	2.24167e-42	1.30459	1.91271
		Graduate/Bachelors	.23900*	0.00201084	0.0586286	0.419362				Rich/affluent	1.96604*	2.74573e-13	1.28094	2.65115
		PhD./MD/MBA/Professionals	-0.0729089	1	-0.273226	0.127408			Middle class	Lower middle class	-1.03581*	8.43913e-23	-1.30701	-0.764607
	PhD./MD/MBA/Professionals	≤ High School	.74364*	3.14109e-17	0.505214	0.982062				Upper middle class	.57284*	2.68074e-11	0.355141	0.790531
		Undergraduate	.28420*	0.000506012	0.0874977	0.480898				Rich/affluent	.93023*	0.000996664	0.278845	1.58162
		Graduate/Bachelors	.31190*	0.000206196	0.106462	0.517347			Upper middle class	Lower middle class	-1.60865*	2.24167e-42	-1.91271	-1.30459
		Masters	0.0729089	1	-0.127408	0.273226				Middle class	-.57284*	2.68074e-11	-0.790531	-0.355141
Stress	≤ High School	Undergraduate	0.23843	0.555138	-0.111203	0.588063				Rich/affluent	0.357396	0.939174	-0.30834	1.02313
		Graduate/Bachelors	.62938*	1.10052e-05	0.267239	0.991529			Rich/affluent	Lower middle class	-1.96604*	2.74573e-13	-2.65115	-1.28094
		Masters	.63726*	5.29423e-06	0.281043	0.993471				Middle class	-.93023*	0.000996664	-1.58162	-0.278845
		PhD./MD/MBAProfessionals	.97929*	1.93535e-11	0.589967	1.36862				Upper middle class	-0.357396	0.939174	-1.02313	0.30834
	Undergraduate	≤ High School	-0.23843	0.555138	-0.588063	0.111203		Preventive behavior	Lower middle class	Middle class	-0.0340516	1	-0.274736	0.206633
		Graduate/Bachelors	.39095*	0.00118671	0.10597	0.675938				Upper middle class	-0.210167	0.238273	-0.479809	0.059476
		Masters	.39883*	0.00055034	0.121418	0.676236				Rich/affluent	-0.353846	0.734627	-0.958423	0.250731
		PhD./MD/MBA/Professionals	.74086*	7.69194e-10	0.422049	1.05968			Middle class	Lower middle class	0.0340516	1	-0.206633	0.274736
	Graduate/Bachelors	≤ High School	-.62938*	1.10052e-05	-0.991529	-0.267239				Upper middle class	-0.176115	0.0954751	-0.368853	0.0166229
		Undergraduate	-.39095*	0.00118671	-0.675938	-0.10597				Rich/affluent	-0.319794	0.850508	-0.89421	0.254622
		Masters	0.00787289	1	-0.285148	0.300894			Upper middle class	Lower middle class	0.210167	0.238273	-0.059476	0.479809
		PhD./MD/MBA/Professionals	.34991*	0.0313753	0.0174216	0.682397				Middle class	0.176115	0.0954751	-0.0166229	0.368853
	Masters	≤ High School	-.63726*	5.29423e-06	-0.993471	-0.281043				Rich/affluent	-0.143679	1	-0.730818	0.44346
		Undergraduate	-.39883*	0.00055034	-0.676236	-0.121418			Rich/affluent	Lower middle class	0.353846	0.734627	-0.250731	0.958423
		Graduate/Bachelors	-0.00787289	1	-0.300894	0.285148				Middle class	0.319794	0.850508	-0.254622	0.89421
		PhD./MD/MBA/Professionals	.34204*	0.0323183	0.0160183	0.668054				Upper middle class	0.143679	1	-0.44346	0.730818
	PhD./MD/MBA/Professionals	≤ High School	-.97929*	1.93535e-11	-1.36862	-0.589967
		Undergraduate	-.74086*	7.69194e-10	-1.05968	-0.422049		*. The mean difference is significant at the 0.05 level.
		Graduate/Bachelors	-.34991*	0.0313753	-0.682397	-0.0174216
		Masters	-.34204*	0.0323183	-0.668054	-0.0160183
Preventive behavior	≤ High School	Undergraduate	-.43324*	0.000476638	-0.732081	-0.134389
		Graduate/Bachelors	-.31158*	0.0465498	-0.620621	-0.00253003
		Masters	-.75338*	4.26469e-11	-1.05774	-0.449019
		PhD./MD/MBA/Professionals	-.61317*	2.52227e-06	-0.946543	-0.279801
	Undergraduate	≤ High School	.43324*	0.000476638	0.134389	0.732081
		Graduate/Bachelors	0.12166	1	-0.123014	0.366333
		Masters	-.32014*	0.00168129	-0.558871	-0.0814157
		PhD./MD/MBA/Professionals	-0.179937	0.659297	-0.454695	0.0948211
	Graduate/Bachelors	≤ High School	.31158*	0.0465498	0.00253003	0.620621
		Undergraduate	-0.12166	1	-0.366333	0.123014
		Masters	-.44180*	8.32514e-06	-0.693182	-0.190425
		PhD./MD/MBA/Professionals	-.30160*	0.0305847	-0.587415	-0.0157781
	Masters	≤ High School	.75338*	4.26469e-11	0.449019	1.05774
		Undergraduate	.32014*	0.00168129	0.0814157	0.558871
		Graduate/Bachelors	.44180*	8.32514e-06	0.190425	0.693182
		PhD./MD/MBA/Professionals	0.140206	1	-0.140539	0.420952
	PhD./MD/MBA/Professionals	≤ High School	.61317*	2.52227e-06	0.279801	0.946543
		Undergraduate	0.179937	0.659297	-0.0948211	0.454695
		Graduate/Bachelors	.30160*	0.0305847	0.0157781	0.587415
		Masters	-0.140206	1	-0.420952	0.140539
*. The mean difference is significant at the 0.05 level.
