# Supplementary material for: The Influence of Sociodemographic Heterogeneity on the Perceptions of COVID-19: A Countrywide Survey Study in the USA
Source: Int J Environ Res Public Health. 2021 Aug 25;18(17):8922. doi: 10.3390/ijerph18178922 (PMC8431068; doi:10.3390/ijerph18178922)
Supplement: Supplementary file 1 [file ijerph-18-08922-s001.zip › Supplemental table S3.xlsx]

## Sheet: Sheet1
Parameter estimates
	Stress					Knowledge					Preventive behavior
Independent variables	Beta	t-statistics	p-value	95% Confidence Interval		Beta	t-statistics	p-value	95% Confidence Interval		Beta	t-statistics	p-value	95% Confidence Interval
				Lower Bound	Upper Bound				Lower Bound	Upper Bound				Lower Bound	Upper Bound
Gender Female	0.66129	7.69629	1.90458e-14	0.492814	0.829766	0.193089	3.73487	0.000191413	0.0917188	0.294459	0.729331	9.69411	6.81834e-22	0.581813	0.876849
Gender Male	0a					0a					0a
Age group 1	0.921477	4.92783	8.78027e-07	0.554822	1.28813	0.314354	2.79395	0.00524094	0.093742	0.534966	0.236686	1.44556	0.148408	-0.0843579	0.55773
Age group 2	0.928499	7.47525	1.01369e-13	0.684951	1.17205	0.405487	5.42562	6.24957e-08	0.258947	0.552027	-0.105369	-0.968832	0.332709	-0.31862	0.107882
Age group 3	0.680798	5.43639	5.88688e-08	0.43525	0.926346	0.272375	3.61483	0.000305634	0.124632	0.420119	-0.185608	-1.69271	0.0906172	-0.40061	0.0293939
Age group 4	0.442724	3.61008	0.000311265	0.202263	0.683185	0.146537	1.98591	0.0471375	0.00185402	0.291219	-0.0444351	-0.413812	0.679042	-0.254983	0.166113
Age group 5	0a					0a					0a
Education level 1	0.381328	2.59945	0.0093845	0.0936902	0.668966	-0.602315	-6.82392	1.07352e-11	-0.775383	-0.429246	-0.605187	-4.71157	2.57346e-06	-0.857043	-0.353331
Education level 2	0.262508	2.17501	0.0297093	0.0258566	0.499159	-0.237867	-3.27554	0.00106697	-0.380258	-0.0954768	-0.231237	-2.18812	0.0287404	-0.438449	-0.0240245
Education level 3	0.0582009	0.472905	0.636316	-0.183114	0.299516	-0.280222	-3.78421	0.000157306	-0.425418	-0.135026	-0.331795	-3.07899	0.00209642	-0.543091	-0.120499
Education level 4	0.106252	0.901468	0.367414	-0.124857	0.337361	-0.123474	-1.74106	0.0817783	-0.262529	0.015582	0.0950107	0.920614	0.357328	-0.107349	0.29737
Education level 5	0a					0a					0a
Race Asian	-0.25909	-1.45988	0.144431	-0.607078	0.0888969	-0.646772	-6.05682	1.56672e-09	-0.856152	-0.437391	0.0334461	0.215231	0.829602	-0.271252	0.338144
Race Black	-0.193083	-1.25766	0.208617	-0.494114	0.107948	-0.758853	-8.21492	3.15636e-16	-0.93998	-0.577726	0.491213	3.6541	0.000262639	0.22763	0.754796
Race Hispanic	0.325992	2.16618	0.0303784	0.0309109	0.621072	-0.624156	-6.89301	6.67036e-12	-0.801702	-0.446609	0.396946	3.01241	0.00261417	0.138573	0.655319
Race Other	-0.0163508	-0.0915805	0.927038	-0.366429	0.333727	-0.414542	-3.85888	0.000116382	-0.62518	-0.203904	-0.0390536	-0.249815	0.802748	-0.345582	0.267475
Race White	0a					0a					0a
Financial level 1	1.44844	5.34245	9.87743e-08	0.916838	1.98005	-0.575985	-3.53084	0.000420675	-0.895846	-0.256123	-0.377951	-1.59209	0.111473	-0.843426	0.0875245
Financial level 2	0.615456	2.41808	0.0156638	0.116393	1.11452	-0.121655	-0.794387	0.427035	-0.421936	0.178626	-0.386336	-1.73353	0.0831075	-0.823317	0.050645
Financial level 3	0.202387	0.780163	0.435358	-0.306271	0.711045	-0.0599587	-0.384134	0.700907	-0.366013	0.246095	-0.264181	-1.16305	0.244905	-0.709563	0.181201
Financial level 4	0a					0a					0a
Rregion East North Central	-0.201831	-1.17966	0.238233	-0.537306	0.133644	0.126043	1.22437	0.22091	-0.0758089	0.327895	0.222113	1.48264	0.138278	-0.0716296	0.515856
Rregion East South Central	-0.0348155	-0.181917	0.855661	-0.410071	0.340441	0.205191	1.78192	0.0748667	-0.0205961	0.430978	0.149114	0.889842	0.373625	-0.179461	0.477689
Rregion Mid-Atlantic	0.00445703	0.0274345	0.978115	-0.314093	0.323007	-0.174325	-1.78335	0.0746328	-0.365993	0.0173434	0.106826	0.750967	0.452734	-0.172097	0.385749
Region Mountain	0.0578514	0.297167	0.76636	-0.323866	0.439569	0.188076	1.60564	0.108463	-0.0415997	0.417751	0.284647	1.66989	0.0950496	-0.0495856	0.61888
Region New England	-0.300114	-1.27871	0.201102	-0.76031	0.160083	0.114746	0.812553	0.416541	-0.162149	0.391641	0.548735	2.67019	0.007623	0.145787	0.951684
Region Pacific	-0.143167	-0.81814	0.413344	-0.486286	0.199952	0.0860971	0.817713	0.413588	-0.120354	0.292548	0.44857	2.92757	0.00344266	0.148135	0.749006
Region South Atlantic	-0.09819	-0.592967	0.553249	-0.422877	0.226497	0.116987	1.17417	0.240425	-0.0783735	0.312348	0.302173	2.08407	0.0372407	0.0178763	0.586469
Region West North Central	-0.403052	-2.0555	0.0399199	-0.787531	-0.018573	0.25694	2.17779	0.029502	0.0256029	0.488276	0.0543866	0.316768	0.751443	-0.282264	0.391037
Region West South Central	0a					0a					0a
Healthcare worker= Yes	-0.360295	-3.73368	0.000192318	-0.549508	-0.171082	-0.0563434	-0.970397	0.331929	-0.170191	0.0575037	0.0396503	0.469265	0.638915	-0.126025	0.205325
Healthcare worker= No	0a					0a					0a
Healthcare access = 1 (least equipped)	1.24374	4.91695	9.27788e-07	0.747763	1.73972	0.089729	0.589558	0.555533	-0.208696	0.388154	0.0750033	0.338641	0.734905	-0.359277	0.509283
Healthcare access = 2	1.01951	6.14466	9.10531e-10	0.69418	1.34484	-0.0328108	-0.328665	0.742433	-0.228557	0.162935	-0.163053	-1.12235	0.261805	-0.44791	0.121805
Healthcare access = 3	0.463907	3.7159	0.000206287	0.219116	0.708698	-0.13781	-1.8346	0.0666669	-0.285098	0.00947816	-0.31373	-2.87001	0.00413424	-0.528069	-0.0993907
Healthcare access = 4	0.210611	2.66048	0.00784568	0.0553903	0.365831	-0.0134113	-0.281566	0.778296	-0.106806	0.0799829	-0.150565	-2.17219	0.0299221	-0.286476	-0.0146537
Healthcare access = 5 (most equipped)	0a					0a					0a
The redundant parameters are set to zero.
